# Supplementary material
Source: publisher figshare collection journal article supplement (https://gsapubs.figshare.com/articles/dataset/_/12541550)
Supplement: Supplementary file 1 [file 1]

## Sheet: Foglio1
Luciani et al. Table DR2. Abundances of calcareous nannofossils from the Varignano section.
		% within 500 specimens																						% within 50-100 sphenoliths							N/6 mm2
Sample	Thickness	Chiasmolithus expansus	Chiasmolithus grandis	Chiasmolithus oamaruensis	Chiasmolithus solitus	Chiasmolithus spp.	Cribrocentrum erbae	Cribrocentrum reticulatum	Cribrocentrum reticulatum/erbae	Tot. Cribrocentrum	Dictyococcites bisectus	Dictyococcites hesslandii	Tot Discoaster	Isthmolithus recurvus	Reticulofenestra umbilicus	Sphenolithus furcatolithoides	Sphenolithus obtusus	Sphenolithus predistentus gr.	Sphenolithus obtusus/predistentus	Sphenolithus spiniger	Sphenolithus sp1	Sphenolithus spp.		Sphenolithus furcatolithoides	Sphenolithus obtusus	Sphenolithus predistentus gr.	Sphenolithus obtusus/predistentus	Sphenolithus spiniger	Sphenolithus sp1		Chiasmolithus expansus	Chiasmolithus grandis	Chiasmolithus oamaruensis	Chiasmolithus solitus	Chiasmolithus spp.	Isthmolithus recurvus
BRD62	3632	0	0	0	0	0	0.766284	0.766284	1.53257	3.06513	0		0.957854	0	0	0	0	0	0	0	0	9.96169									0	0	0	0	0	0
BRD60	3532	0	0	0	0	0	0.790514	0.395257	1.18577	2.37154	0		0.197628	0	0	0	0	0	0	0	0	6.12648									0	0	0	0	0	0
BRD58	3432	0	0	0	0	0	0.959693	3.07102	1.53551	5.56622	0.191939		1.15163	0	0.575816	0	0	0	0	0	0	3.64683									0	0	1	0	0	1
BRD57	3382						2.407	7.22101	0.437637	10.0656																					0	0	0	0	0	0
BRD56	3332	0	*	0.196464	0	0	0	3.33988	0.392927	3.73281	0		0.785855	0	0.392927	0	0	0	0	0	0	5.10806									1	1	1	0	0	2
BRD55	3282						0.898876	5.8427	0	6.74157																										1
BRD54	3245	0	0	0	0	0	0.398406	2.98805	1.79283	5.17928	0.398406		1.19522	0	0	0	0	0	0	0	0	3.58566									0	0	2	0	2	0
BRD53	3195						2	9.37	0.429185	11.7992																										0
BRD52	3145	0	0	0	0	0	1.66	9.9	0.66	12.22	0.452489		0.452489	0	0	0	0	0	0	0	0	4.75113									1	0	0	0	0	0
BRD51	3095						4	8.66	1.33	13.99																										0
BRD50	3045	0	0	0	0	0	5.76497	7.76053	1.33038	14.8559	0.665188		0.886918	0	0	0	0	0	0	0	0	3.10421									0	0	0	0	0	0.5
VRG17	2915	0	0	0	0	0	9.8081	6.39659	2.1322	18.3369	0.639659		1.70576	0	0.426439	0	0	0	0	0	0	5.11727									0	0	0	0	0	0
BRD47	2825						13.2035	4.54545	0.649351	18.3983
BRD46E	2800	0	0	0	0	0	14.2857	5.41126	0.865801	20.5628	0		1.08225	0	0	0	0	0	0	0	0	2.1645									0	0	0	0	0	0
BRD46C	2750	0	0	0	0	0	19.3333	6.44444	3.11111	28.8889	0.222222		0.666667	0	0	0	0	0	0	0	0	2.22222									0	0	1	0	0	0
BRD46A	2700	0	0	0	0	0	15.8482	6.91964	1.5625	24.3304	0		1.33929	0	0.223214	0	0	0	0	0	0	4.91071									0	0	1	0	0	0
BRD45	2650	0	0	0	0	0	17.2727	3.63636	1.81818	22.7273	0		1.36364	0	0	0	0	0	0	0	0	5									0	1	0	0	0	0
BRD43	2600	0	0	0	0	0	15.4567	4.91803	1.17096	21.5457	1.40515		1.40515	0	0.234192	0	0	0	0	0	0	3.0445									0	1	0	0	0	0
BRD41	2550	0	0	0	0	0	17.2566	3.9823	2.21239	23.4513	0		1.10619	0	0.663717	0	0	0	0	0	0	4.42478									0	1	0	0	0	0
BRD39	2500	0	0	0	0	0	17.4107	6.69643	1.33929	25.4464	0.223214		0.892857	0	0.446429	0	0	0	0	0	0	3.57143									2	0	1	0	0	0
BRD37	2450	0	0	0	0	0	16.408	6.87361	1.55211	24.8337	0		0.221729	0	0	0	0	0	0	0	0	3.54767									0.5	0	1	0	0	0
BRD35	2400	0	0	0	0	0	13.3333	12.2222	2	27.5556	0		2.66667	0	0.222222	0	0	0	0	0	0	0.666667									0	0	1	0	0	0
BRD33	2349	0	0	0	0	0	19.6881	5.84795	0	25.5361	0.194932		1.75439	0	0.194932	0	0.194932	0	0	0	0	3.31384									0	0	0	0	0	0
BRD31	2296	0	0	0	0	0	8.86076	8.64979	1.47679	18.9873	0.421941		1.89873	0	0	0	0	0	0	0	0	2.32068									1	0	0	0	0	0
BRD29	2236	0	0	0	0	0	10.6	4.2	1.2	16	1.4		0.6	0	0	0	0	0	0	0	0	1.8									0	0	0.5	0	0	0
BRD28	2211						6.5678	6.5678	1.05932	14.1949
BRD27	2186	0	0	0	0	0	5.38922	14.5709	2.59481	22.5549	1.1976		2.19561	0	0.798403	0	0	0	0	0	0	4.39122									0	1	0	0	0	0
BRD26	2166						5.95745	14.0426	0.851064	20.8511
BRD25	2152	0	0	0	0	0	8.2	6.4	3.4	18	1.8		0.6	0	0.2	0	0	0	0	0	0	3.8									0	0	0	0	0	0
BRD24	2138	0	0	0.212766	0	0	1.70213	9.14894	0	10.8511				0					0													3	1		1
BRD23	2113	0	0	0	0	0	5.5914	6.23656	4.08602	15.914	0.430108		0.860215	0	0.645161	0	0	0	0	0	0	3.22581									0	0	1	0	0	0
BRD22	2088						1.2685	10.7822	0.211416	12.2622
BRD21	2063	0	0	0	0	0	2	5	1.8	8.8	1.6		0.2	0	0	0	0	0	0	0	0	4									0	0	0	0	1	0
BRD20	2038						2.19298	5.04386	1.09649	8.33333
BRD19	2013	0	0	0	0	0	1	8	0.2	9.2	0.8		1.8	0	0.4	0	0	0	0	0	0	6.4									0	1	1	0	0	0
BRD18	1990						0.851064	4.68085	0.212766	5.74468																					1		2
BRD17	1965	0	0	0	0	0	0.8	7.8	0.8	9.4	1		1	0	0	0	0	0	0	0	0	3.4									1	0	0	0	0	0
BRD15	1915	0	0	0	0	0	0.8	9	0.4	10.2	1.6		1.4	0	0	0	0	0	0	0.4	0	4									0	0	0	0	0	0
BRD13	1861	0	0	0	0	0	0.4	10.2	0.8	11.4	1.2		1.4	0	0	0	0	0	0	0	0	4.6									2	1	0	0	2	0
BRD11	1804	0	0	0	0	0	0.4	9.8	0.6	10.8	0.8		0.8	0	0.2	0	0	0	0	0	0	3									0	2	0	0	1	0
BRD09	1754	0	0	0	0	0	0.4	7.2	0.6	8.2	0.6		0.8	0	0.2	0	0	0	0	0	0	3.8									0	1	0	0	7	0
BRD07	1704	0	0	0	0	0	0.395257	6.71937	0.790514	7.90514	1.18577		0.790514	0	0	0	0	0	0	0	0	3.16206									0	0	0	0	5	0
BRD05	1654	0	0	0	0	0	0.6	10.6	0.6	11.8	1.4		1.2	0	0	0	0	0	0	0	0	3.4									0	3	0	0.5	9	0
BRD03	1604	0	0	0	0	0	0.4	8	0.2	8.6	1.4		1.6	0	0.2	0	0	0	0	0	0	6									0	0	0	0	3	0
BRD01	1554	0	0	0	0	0	0	11.2648	0.197628	11.4625	0.790514		1.77866	0	0	0	0	0	0	0	0	4.94071									0	0	0	0	5	0
BRD107	1510	0	0	0	0	0	0.925926	9.9537	0.231481	11.1111	0.462963		0.231481	0	0.231481	0	0	0	0	0	0	5.09259		0	0	0	0	0	0		0	0	0	0	0	0
BRD106	1440																							0	0	0	0	0	0
BRD105	1390	0	0	0	0	0	0.224719	10.1124	0	10.3371	0.449438		0.674157	0	0	0	0	0	0	0	0	6.06742		0	0	0	0	0	0		0	0	0	0	1	0
BRD104	1340																							0	0	0	0	0	0
BRD103	1290	0	0	0	0	0	0	13.0337	0.224719	13.2584	1.34831		2.92135	0	0	0	0	0	0	0	0	4.49438		0	0	0	0	0	0		0	1	0	0	0	0
BRD102	1105	0	0	0	0	0.21645	0.21645	9.74026	0	9.95671	2.38095		2.38095	0	0.21645	0	0	0	0	0	0	6.27706		0	0	0	0	0	0		0	1	0	0	0	0
BRD101	1035	0	0	0	0	0	0.227273	9.54545	0	9.77273	1.36364		3.40909	0	0.454545	0	0	0	0	0	0	6.59091		0	0	0	0	0	0		0	1	0	0	0	0
BRD100	985																							0	0	0	0	0	0
BRD99	935	0	0	0	0	0	0.232558	11.8605	0	12.093	0.697674		0.697674	0	0	0	0	0	0	0	0	8.13953		0	0	0	0	0	0		0	0	0	0	0	0
BRD98	885																							0	1	0	0	0	0
BRD97	835	0	0	0	0	0.268097	1.34048	9.65147	0	10.992	1.34048		2.14477	0	0	0	0	0	0	0	0	6.70241		0	0	0	0	0	0		0	4	0	0	0	0
BRD96	785																							0	0	0	0	0	0
BRD95	767	0	0	0	0	0	0.894855	7.82998	0.447427	9.17226	2.23714		1.11857	0	0.223714	0	0	0	0	0	0	3.57942		0	0.5	0	0	1	0		0	1	0	0	1	0
BRD93	717	0	0	0	0	0	1.13379	10.8844	0.226757	12.2449	0.907029		0.680272	0	0	0	0	0	0	0.226757	0	4.98866		0	1	0	0	2	0		0	0	0	0	5	0
BRD91	662	0	0	0	0	0	1.98238	7.92952	0.660793	10.5727	0.660793		1.10132	0	0	0	0	0	0	0	0	4.18502		0	0	0.5	0	0	0		0	0	0	0	2	0
BRD89	537	0	0	0	0	0	0.666667	7.33333	0.444444	8.44444	1.11111		0.444444	0	0.222222	0	0	0	0	0	0	4.44444		0	3	0	0	0	0		0	0	0	0	3	0
BRD87	462	0	0	0	0	0	0	5.46697	0	5.46697	2.73349		2.05011	0	0	0	0	0	0	0	0.22779	3.18907		0	13	0	0	0	2		0	0	0	1	1	0
BRD85	392	0	0	0	0	0	0	3.73832	0	3.73832	0.934579		3.97196	0	0	0	0.46729	0.233645	0	0	0.233645	3.27103		0	12	0.5	0	2	8		0	2	0	0	3	0
BRD83	342	0	0	0	0	0	0	3.71991	0	3.71991	2.407		1.96937	0	0.218818	0	0.437637	0	0	0	0.218818	3.50109		0	6	0	0	0	2		0	0	0	0	0	0
BRD81	280	0	0	0	0	0	0.437637	8.09628	0.218818	8.75274	1.96937		1.53173	0	0	0	0.218818	0	0	0	0	2.84464		0	4	0	0	0	6		0	0	0	0	3	0
BRD79	220	0	0	0	0	0	0	8.64979	0.632911	9.2827	0.421941		1.89873	0	0	0	0.21097	0	0	0.21097	0.21097	4.64135		0	4	0	0	1	4		0	0	0	0	0	0
BRD77	160	0	0	0	0	0	0.214133	8.99358	0.428266	9.63597	0.642398		3.64026	0	0.214133	0	0.856531	0.428266	0	0	0	2.56959		0	14	0.5	0	2	4		0	3	0	3	2	0
BRD75	100	0	0	0	0	0	0	6.34573	0	6.34573	1.31291		3.93873	0	0	0	0.437637	0.218818	0	0.218818	0	2.18818		0	16	4	0	2	4		0	4	0	1	17	0
BRD74	50
FBG +015	15	0	0	0	0	0	0	6.91145	0	6.91145	1.51188		1.94384	0	0	0	0	0	0.215983	0	0	8.20734		0	0.5	1	1	1	0		1	1	0	0	5	0
RBD 7	-15.5	0	0.4	0	0.2	0.2	0	16	0	16	0.6	2.2	2.6	0	0.6	0	0	0	0	0.4	0	4.8		2	0	0	0	8	0		0	5	0	2	6	0
RBD 6	-32	0	0	0	0	0.6	0	10.4	0	10.4	0.1	1.2	1.8	0	0.6	0	0	0.2	0	0.8	0	6.4		0	0	6	0	10	0		0	2	0	0	4	0
RBD 5	-33	0	0	0	0	0.666667	0	2	0	2	0		0.333333	0	0.333333	1.33333	0	0	0	2	0	15.6667		8	0	0	0	12	0		0	1	0	0	0	0
RBD 4	-49	0	0	0	0	0	0	7	0.333333	7.33333	2.66667	5.33333	0	0	0	0	0.333333	0	0	0	0	12.6667		0	4	4	0	0	0		0	1	0	0	0	0
RBD3	-58	0	0	0	0	0	0	1.33333	0	1.33333	2.66667	6.33333	0.666667	0	0.333333	0	1	0	0	0.333333	0	11.6667		0	3.52941	0	0	2.35294	0		0	1	0	0	0	0
FBG -063	-63	0	0	0	0	0	0	5.49451	0	5.49451	1.31868		1.53846	0	0.21978	0	0	0.21978	0.21978	0	0	4.3956		0	2	5	1	0	0		0	2	0	0	3	0
RBD2	-76	0	0	0	0	0	0	1.66667	0	1.66667	2	6	0.666667	0	0.666667	0.333333	0.666667	0.666667	0	0	0	9		1.2987	5.19481	3.8961	0	0	1.2987		0	4	0	0.5	1	0
FBG -083	-83	0	0	0	0	0	0	5	0	5	0		1.30435	0	0	0	0	0.652174	0	0	0	5		0	2	6	0	2	0		0	1	0	0	2	0
FBG -123	-123	0	0	0	0	0.21692	0	4.98915	0	4.98915	0.21692		1.51844	0	0.433839	0	0	1.0846	0	0	0.21692	3.03688		0	0	16	2	0	2		0	0	0	0	8	0
FBG -143	-143																							0	0	10	0	1	2
FBG -163	-163	0	0	0	0	0	0	4.61216	0	4.61216	0.838574		1.25786	0	0.209644	0	0	1.88679	0	0.209644	0	2.72537		0	0	26	2	2	0		0	0	0	0	4	0
RBD1	-183	0	0	0	0	0	0	0.666667	0	0.666667	3.33333	7	0	0	2.33333	0	0	0.333333	0	0	0	5		0	0	10.7692	0	0	0		0	0	0	0.5	3	0
FBG -203	-203	0	0	0	0.217865	0	0	1.74292	0	1.74292	0.43573		1.74292	0	0.217865	0	0	0.217865	0	0.43573	0	2.61438		0	0	6	0	16	0		0	1	0	1	4	0
BRD 63bis	-222	0	0.333333	0	0	0	0	4.66667	0	4.66667	0.666667	8.33333	0.666667	0	0	0	0	0.333333	0	1.33333	0	9.66667		0	0	2	0	20	0		0	1	0	0	0	0
BRD 63	-243	0	0	0	0	0	0	3.02376	0	3.02376	0.431965	11.0151	1.51188	0	0.431965	0	0	0	0	4.31965	0	5.61555		0	0	0	0	37	0		0	0	0	0	6	0
BRD 65	-293	0	0	0	0	0	0	5.12249	0	5.12249	0.445434	6.01336	1.3363	0	0.445434	0	0	0	0	1.55902	0	9.79955		0	0	0	0	10	0		0	0	0	0	17	0
BRD 67	-343	0	0	0	0	0	0	4.54545	0.21645	4.7619	0.649351	5.19481	1.2987	0	0.21645	0	0	0	0	1.51515	0	10.3896		0	0	0	0	11	0		0	0	0	0	18	0
BRD 68	-368										0.2
BRD 69	-393	0	0	0	0	0	0.220264	5.06608	0.220264	5.50661	0	4.40529	2.20264	0	0.440529	0	0	0	0	0.660793	0	8.59031		0	0	1	0	12	0		0	0	0	0	4	0
BRD 71	-443	0	0.215517	0	0	0	0.862069	4.52586	0.646552	6.03448	0	0.431034	0.862069	0	0	0	0	0	0	0	0	12.069		0	0	0	0	4	0		0	1	0	0	8	0
RBD-1	-452	0	0.666667	0	0	0	0	2	0	2	0.0166667	0	0.666667	0	0.666667	0.333333	0	0	0	2.33333	0	16		2	0	0	0	14	0		0	2	0	0	1	0
BRD 72	-473																							0	0	1	0	1	0
RBD-2	-497	0	0	0	0	0	0.666667	2.66667	0.333333	3.66667	0	0	0.333333	0	0	2.66667	0	0	0	1.33333	0	20.6667		13.0435	0	0	0	7.6087	0		0	0	0	0	0	0
BRD 73	-528	0	0	0	0	0.440529	0.440529	7.26872	0.440529	8.14978	0	0	2.20264	0	0.440529	1.32159	0	0	0	0.220264	0	9.91189		12	0	0	0	2	0		0	1	0	1	29	0
RBD-3	-593	0	0	0	0	0	0	2.33333	0	2.33333	0	0	0.666667	0	1	2	0	0	0	2.33333	0	20.3333		9.89011	0	0	0	10.989	0		0	0	0	0	0	0
